# Supplementary material for: Synthesis, crystal structure, and Hirshfeld analysis of an ultrashort hybrid peptide
Source: publisher site journal article supplement (doi:10.1515/zkri-2025-0022), 2025-07-21
Supplement: Supplementary file 1 [file j_zkri-2025-0022_suppl_001.docx]

**Supplementary materials**

**Synthesis, Crystal Structure, and Hirshfeld Analysis of an Ultrashort Hybrid Peptide**

Subrata Ranjan Dhara a, Purak Das b, Suven Das b, Arpita Dutta c*

a Department of Chemistry, University of Kalyani, Kalyani, Nadia-741235, India

b Department of Chemistry, Rishi Bankim Chandra College for Women, Naihati, 24-Parganas

(N) -743165, India

c Department of Chemistry, Rishi Bankim Chandra Evening College, Naihati, 24-Parganas

(N)-743165, India; e-mail: [arpitachem@yahoo.co.in](mailto:arpitachem@yahoo.co.in)

| **Contents:** | **Page** |
| --- | --- |
| **Figure S1**  The 1H NMR spectra of compound **1** | S2 |
| **Figure S2**  The 13C NMR spectra of compound **1** | S2 |
| **Figure S4**  FT-IR spectrum of compound **1** | S3 |
| **Table S1** *Cg***···***Cg* interactions in **1** | S3 |
| **Table S2** C–H**···***Cg* interactions in **1** | S3 |


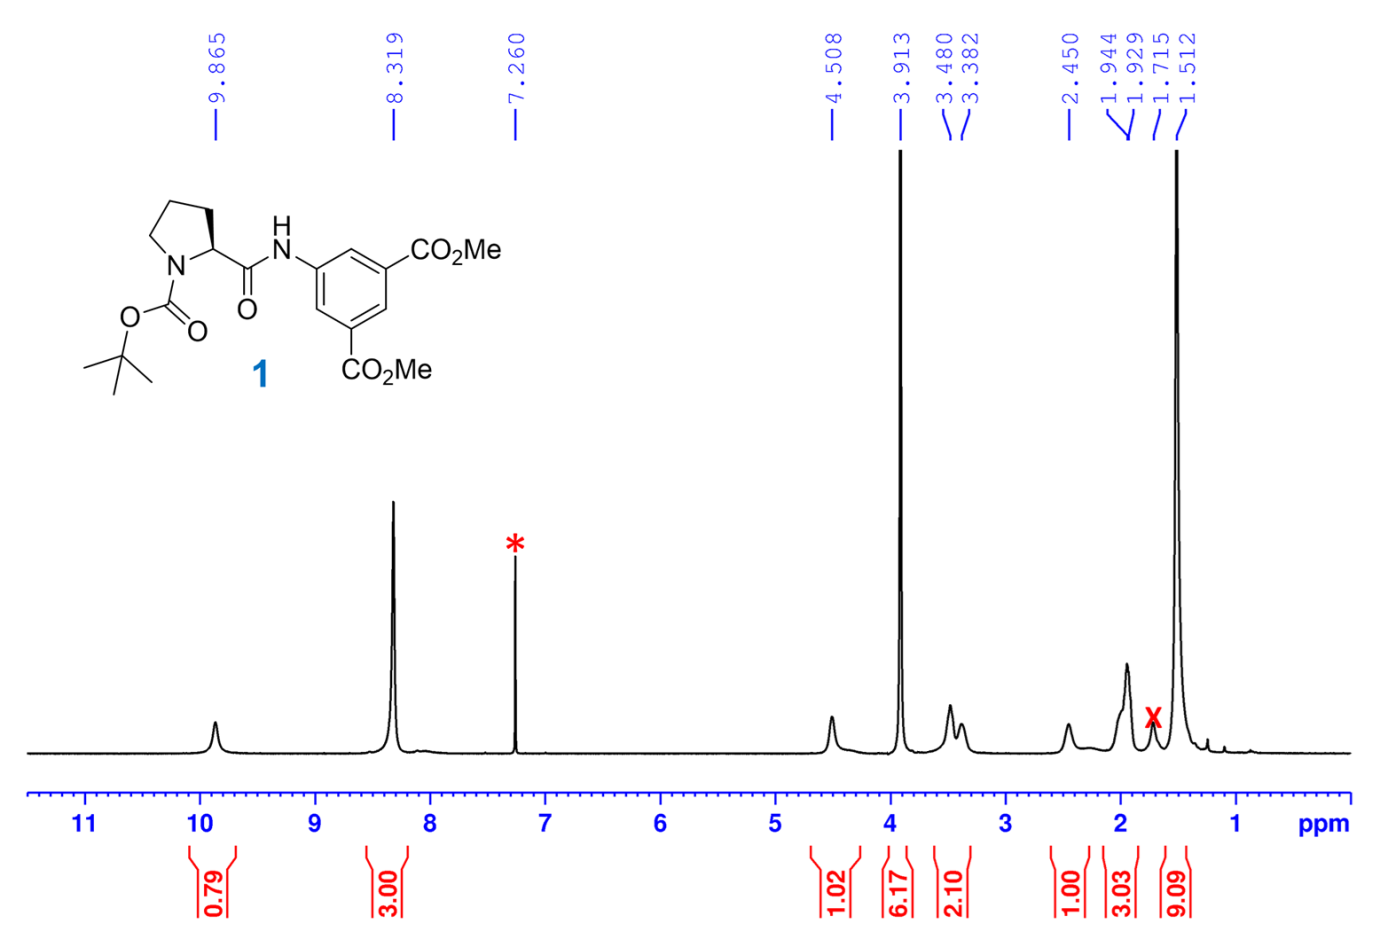


**Figure S1**: 1H NMR (CDCl3, 400 MHz) spectrum of the compound **1** (* indicates the solvent peak).


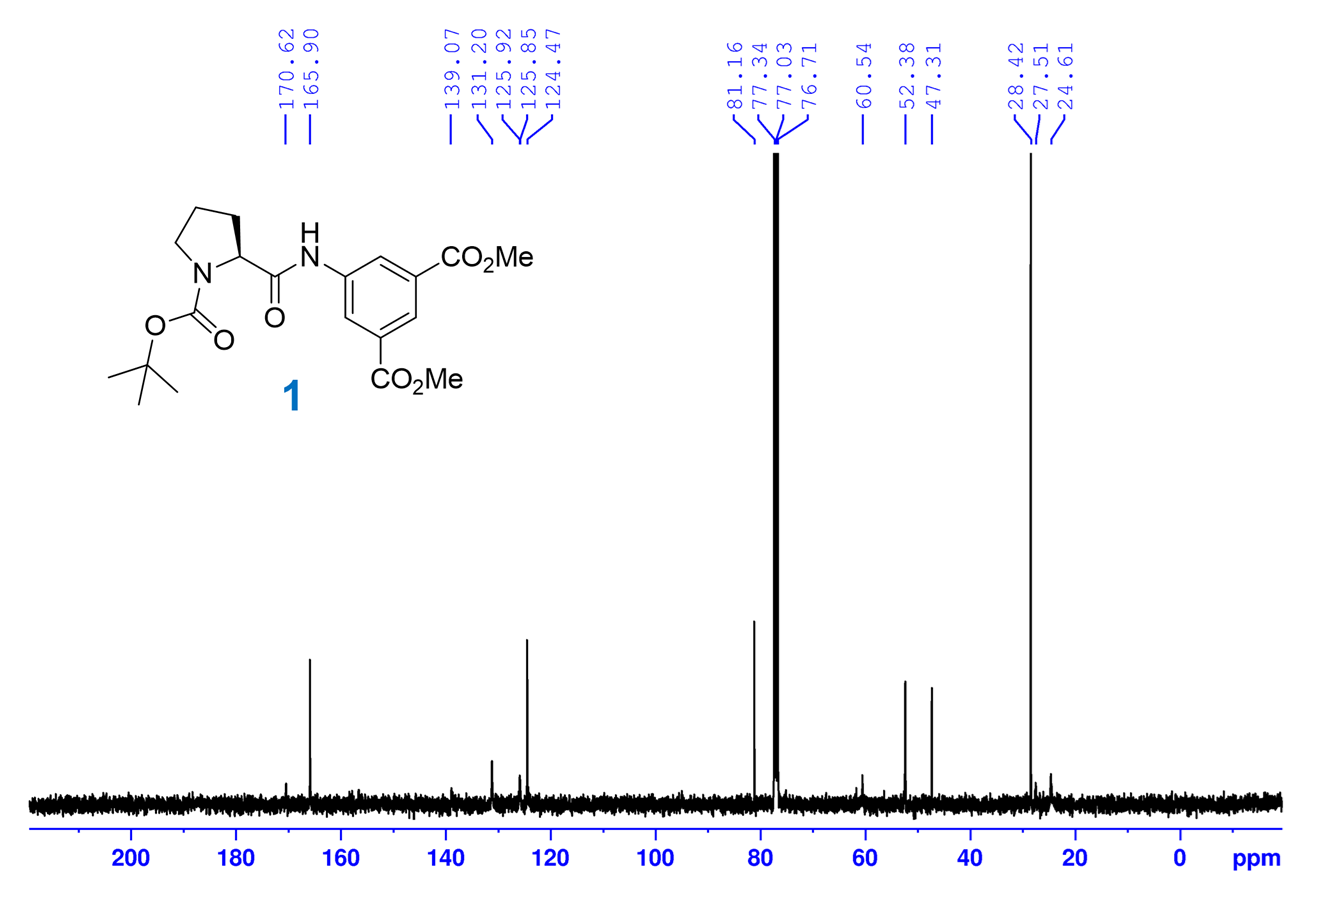


**Figure S2**: 13C NMR (CDCl3, 100 MHz) spectrum of the compound **1.**


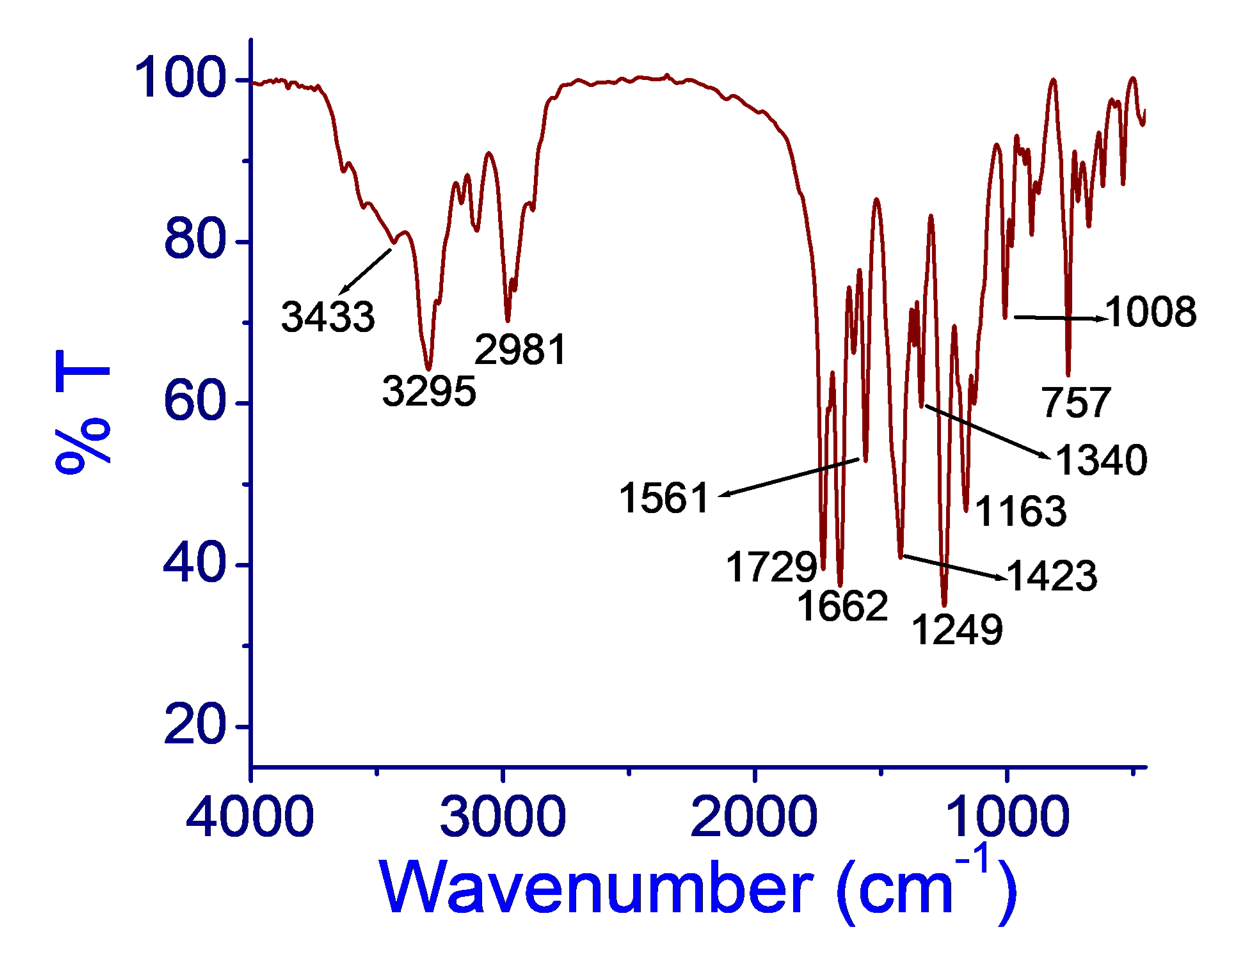


**Figure S3**: FT IR spectrum of **1**.

**Table S1** *Cg***···***Cg* interactions in **1**

| *Cg*(I)**···***Cg*(J) | *Cg*–*Cg* | CgI_Perp | CgJ_Perp | Slippage |
| --- | --- | --- | --- | --- |
| *Cg*2**···***Cg*6 | 3.756(4) | 3.352(3) | 3.385(2) | 1.628 |
| *Cg*4**···***Cg*8 | 3.651(4) | 3.494(3) | 3.485(2) | 1.088 |

*Cg2, Cg4, Cg6 and Cg8 are the centroids of C1–C6, C21–C26, C41 – C46 and C61–C66 rings respectively*.

**Table S2** C–H**···***Cg* interactions in **1**

| Bond | H**···***Cg* | H-Perp | Gamma | X - H**···** *Cg* |
| --- | --- | --- | --- | --- |
| C(58)–H(58)**···***Cg*6ii | 2.82 | 2.72 | 15.07 | 3.559(7) |
| C(70)–H(70C)**···***Cg*4ii | 2.90 | 2.79 | 15.99 | 3.734(8) |
| C(78)–H(78B)**···***Cg*8vi | 2.93 | -2.89 | 9.67 | 3.776(7) |

*Symmetry codes: (ii) x, -1+y, z; (vi) x, 1+y, z*. *Cg4, Cg6 and Cg8 are the centroids of C21 – C26, C41 –C46 and C61–C66 rings respectively*.
